# Supplementary material for: Scope and Limitations of γ-Valerolactone (GVL) as a Green Solvent to be Used with Base for Fmoc Removal in Solid Phase Peptide Synthesis
Source: PubMed Central journal article supplement (PMC6864637; doi:10.3390/molecules24214004), 2019-11-05
Supplement: molecules-24-04004-s001.pdf [file molecules-24-04004-s001.pdf]

## Supporting Information

# Scope and Limitations of $\gamma$ -Valerolactone (GVL) as a Green Solvent to be Used with Base for Fmoc Removal in Solid Phase Peptide Synthesis

Ashish Kumar <sup>1,2</sup>, Anamika Sharma <sup>1,2</sup>, Beatriz G. de la Torre <sup>2,\*</sup> and Fernando Albericio <sup>1,3,4,\*</sup>

<sup>1</sup> Peptide Science Laboratory, School of Chemistry and Physics, University of KwaZulu-Natal, Durban 4001, South Africa; ashishpy12@gmail.com (A.K.); anamika.aug14@gmail.com (A.S.)

<sup>2</sup> KwaZulu-Natal Research Innovation and Sequencing Platform (KRISP), School of Laboratory Medicine and Medical Sciences, College of Health Sciences, University of KwaZulu-Natal, Durban 4041, South Africa

<sup>3</sup> Department of Organic Chemistry, University of Barcelona, Martí i Franqués 1-11, Barcelona 08028, Spain

<sup>4</sup> CIBER-BBN, Networking Centre on Bioengineering, Biomaterials and Nanomedicine, Barcelona Science Park, Baldiri Reixac 10, Barcelona 08028, Spain

\* Correspondence: garciadelatorreb@ukzn.ac.za (B.G.d.l.T.); Albericio@ukzn.ac.za (F.A.)

| Sl. No. | Content                                                              |
|---------|----------------------------------------------------------------------|
| 1       | : <b>Figure 1:</b> <sup>1</sup> H NMR of GVL                         |
| 2       | : <b>Figure 2:</b> <sup>13</sup> C NMR of GVL                        |
| 3       | : <b>Figure 3:</b> <sup>1</sup> H NMR of PIP                         |
| 4       | : <b>Figure 4:</b> <sup>13</sup> C NMR of PIP                        |
| 5       | : <b>Figure 5:</b> <sup>1</sup> H NMR of 4-MP                        |
| 6       | : <b>Figure 6:</b> <sup>13</sup> C NMR of 4-MP                       |
| 7       | : <b>Figure 7:</b> <sup>1</sup> H NMR of 20% PIP in GVL at 0 min     |
| 8       | : <b>Figure 8:</b> <sup>1</sup> H NMR of 20% PIP in GVL after 2 h    |
| 9       | : <b>Figure 9:</b> <sup>1</sup> H NMR of 20% PIP in GVL after 4 h    |
| 10      | : <b>Figure 10:</b> <sup>1</sup> H NMR of 20% PIP in GVL after 6 h   |
| 11      | : <b>Figure 11:</b> <sup>1</sup> H NMR of 20% PIP in GVL after 24 h  |
| 12      | : <b>Figure 12:</b> <sup>1</sup> H NMR of 20% PIP in GVL after 48 h  |
| 13      | : <b>Figure 13:</b> <sup>1</sup> H NMR of 20% PIP in GVL after 72 h  |
| 14      | : <b>Figure 14:</b> <sup>1</sup> H NMR of 20% PIP in GVL after 96 h  |
| 15      | : <b>Figure 15:</b> <sup>1</sup> H NMR of 20% 4-MP in GVL at 0 min   |
| 16      | : <b>Figure 16:</b> <sup>1</sup> H NMR of 20% 4-MP in GVL after 2 h  |
| 17      | : <b>Figure 17:</b> <sup>1</sup> H NMR of 20% 4-MP in GVL after 4 h  |
| 18      | : <b>Figure 18:</b> <sup>1</sup> H NMR of 20% 4-MP in GVL after 6 h  |
| 19      | : <b>Figure 19:</b> <sup>1</sup> H NMR of 20% 4-MP in GVL after 24 h |
| 20      | : <b>Figure 20:</b> <sup>1</sup> H NMR of 20% 4-MP in GVL after 48 h |
| 21      | : <b>Figure 21:</b> <sup>1</sup> H NMR of 20% 4-MP in GVL after 72 h |

- 22 : **Figure 22:**  $^1\text{H}$  NMR of 20% 4-MP in GVL after 96h
- 23 : **Figure 23:**  $^1\text{H}$  NMR of equimolar solution of GVL and PIP after 1h MW at 90  $^\circ\text{C}$
- 24 : **Figure 24:**  $^{13}\text{C}$  NMR of equimolar solution of GVL and PIP after 1h MW at 90  $^\circ\text{C}$
- 25 : **Figure 25:** DEPT 135 of equimolar solution of GVL and PIP after 1h MW at 90  $^\circ\text{C}$
- 26 : **Figure 26:** HSQC of equimolar solution of GVL and PIP after 1h MW at 90  $^\circ\text{C}$
- 27 : **Figure 27:** HMBC of equimolar solution of GVL and PIP after 1h MW at 90  $^\circ\text{C}$
- 28 : **Figure 28:** COSY of equimolar solution of GVL and PIP after 1h MW at 90  $^\circ\text{C}$
- 29 : **Figure 29:**  $^1\text{H}$  NMR of equimolar solution of GVL and 4-MP after 1h MW at 90  $^\circ\text{C}$
- 30 : **Figure 30:**  $^{13}\text{C}$  NMR of equimolar solution of GVL and 4-MP after 1h MW at 90  $^\circ\text{C}$
- 31 : **Table 1:**  $^1\text{H}$ ,  $^{13}\text{C}$  NMR and HBMC correlation of mixture of Product (**3a**) GVL and PIP
  
- 32 : Internal Coordinates for GVL
- 33 : Internal Coordinates for PIP
- 34 : Internal Coordinates for 4-MP
- 35 : Internal Coordinates for TS for GVL and PIP
- 36 : Internal Coordinates for TS for GVL and 4-MP
- 37 : **Figure 31:** Optimized geometry of GVL, PIP and 4-MP with bond lengths

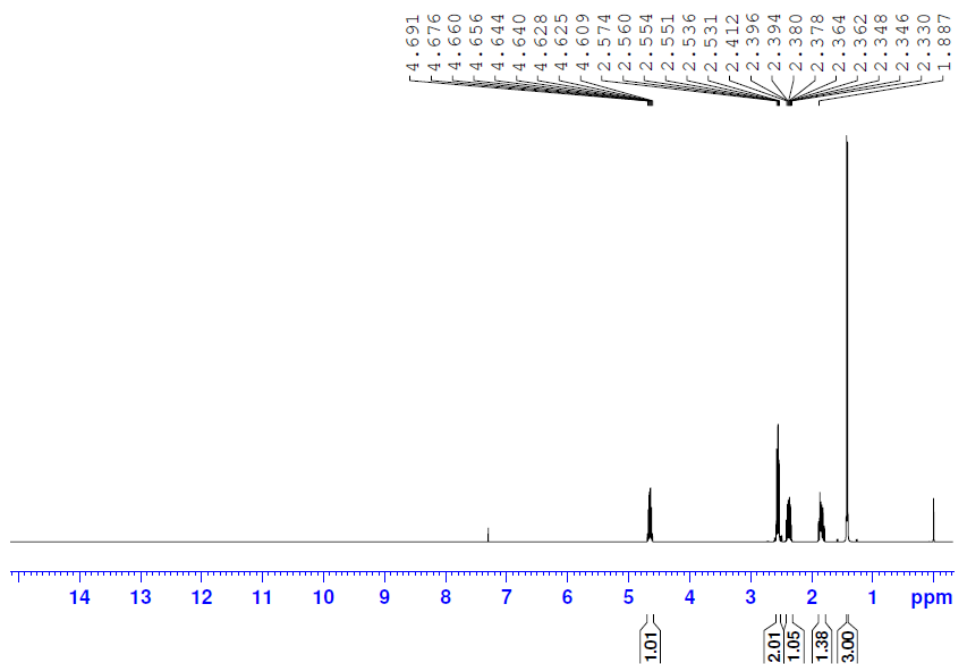

**Figure 1.**  $^1\text{H}$  NMR of GVL

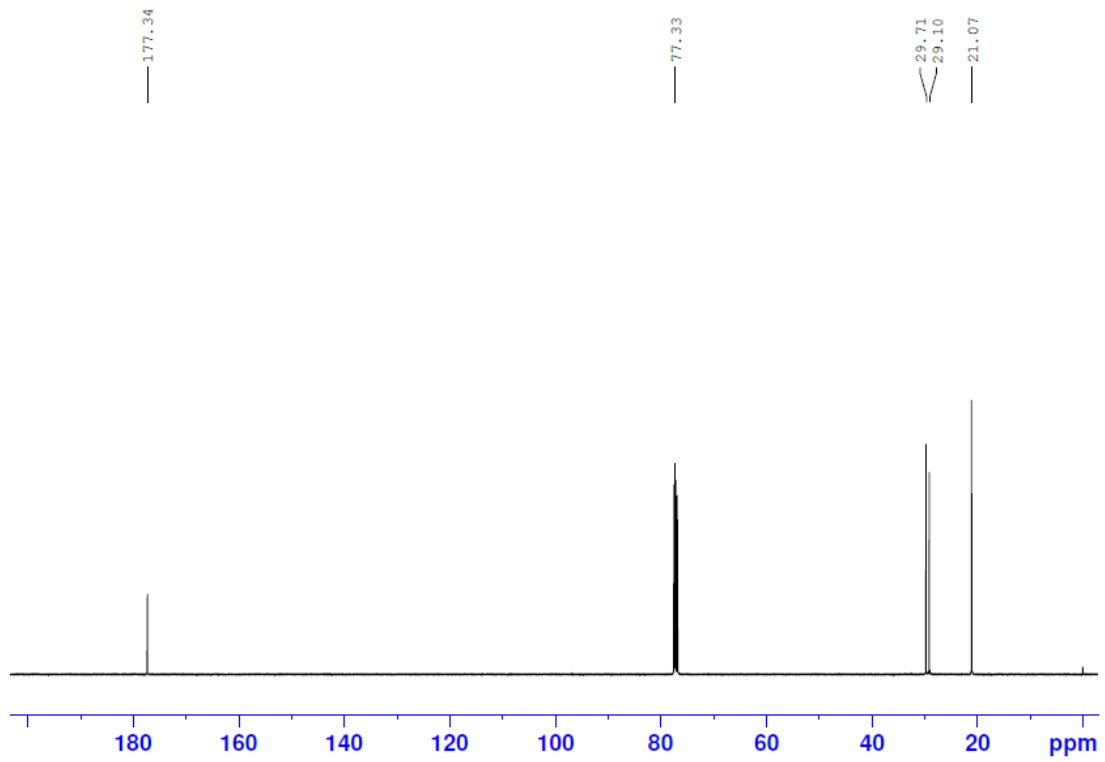

**Figure 2.**  $^{13}\text{C}$  NMR of GVL

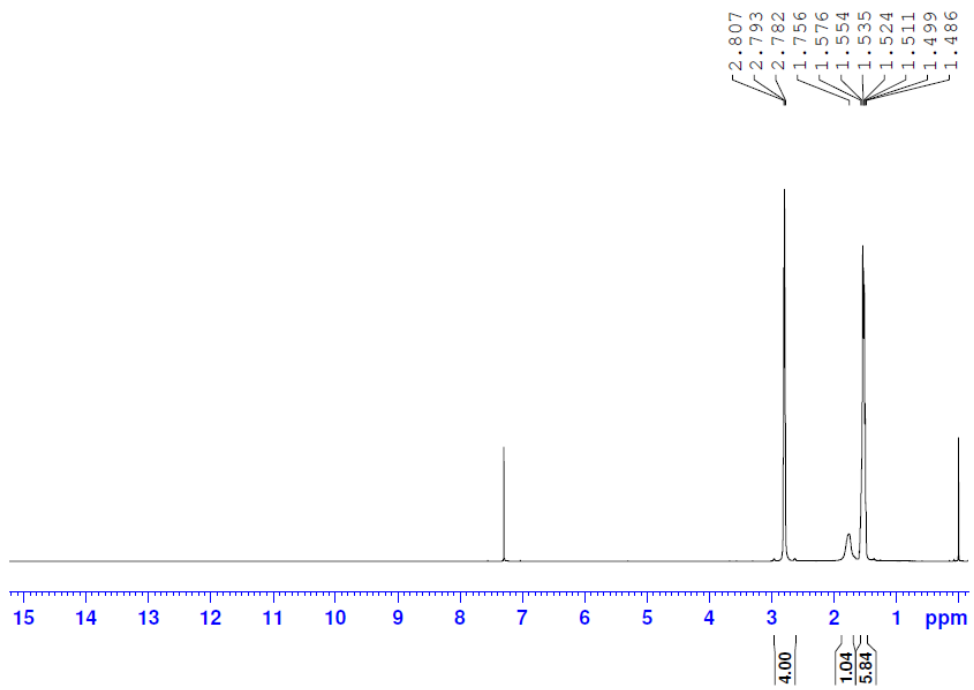

**Figure 3.**  $^1\text{H}$  NMR of PIP

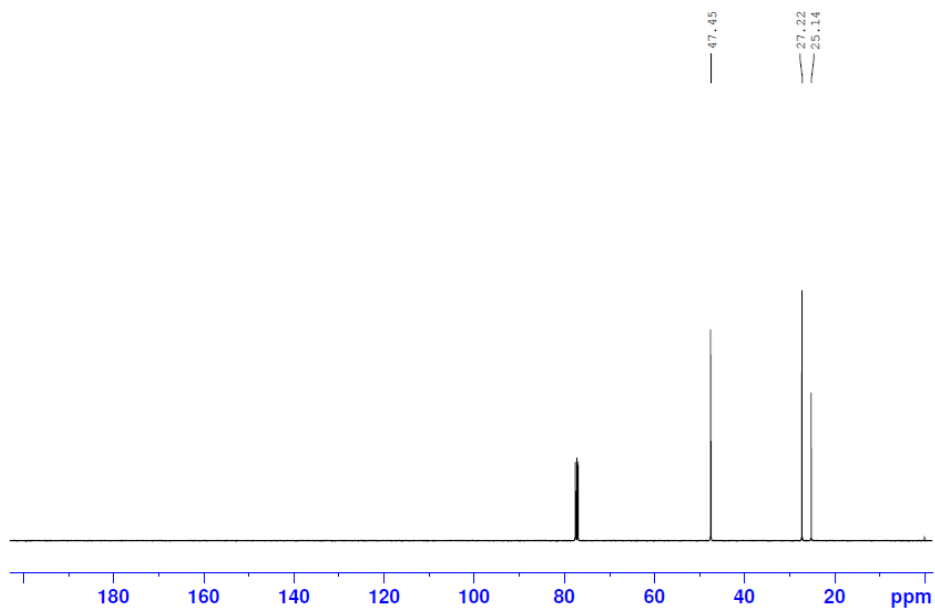

Figure 4. <sup>13</sup>C NMR of PIP

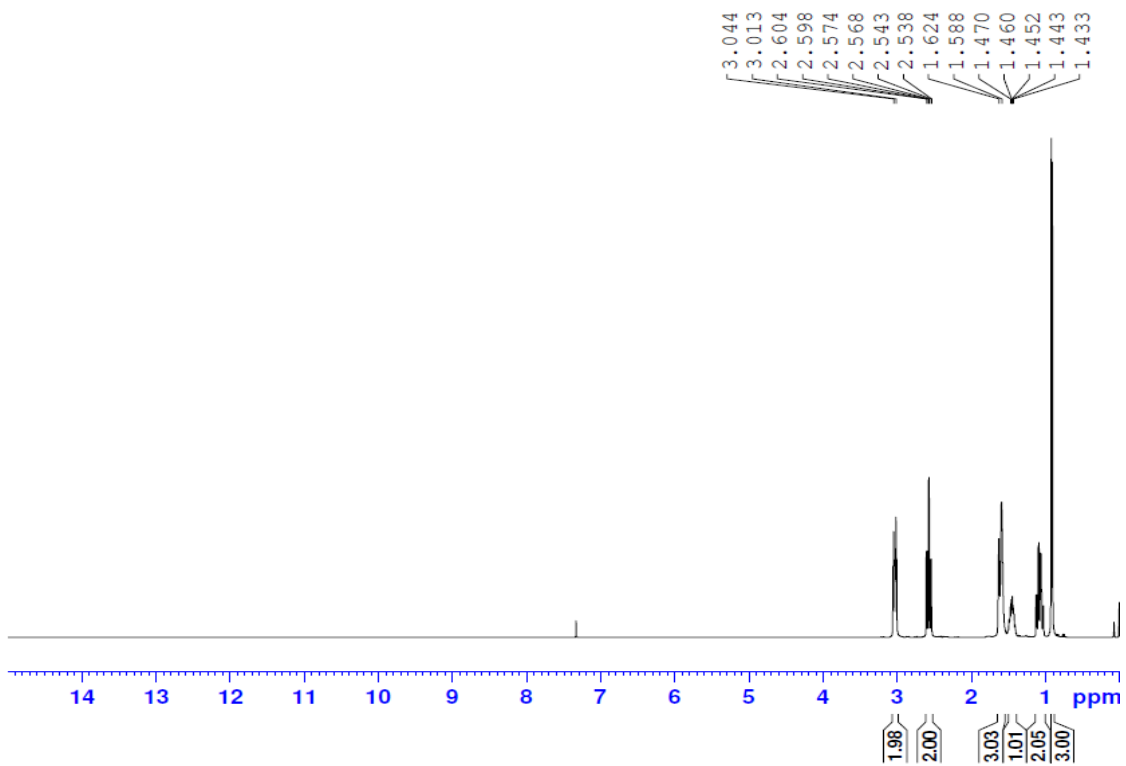

Figure 5. <sup>1</sup>H NMR of 4-MP

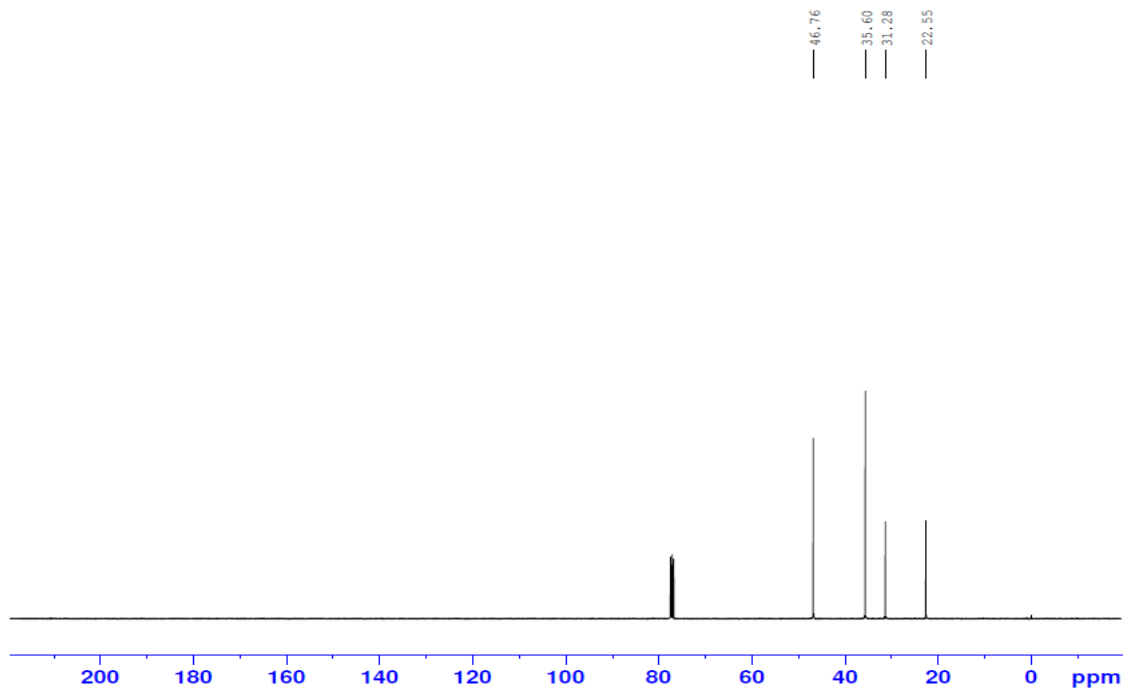

**Figure 6.**  $^{13}\text{C}$  NMR of 4-MP

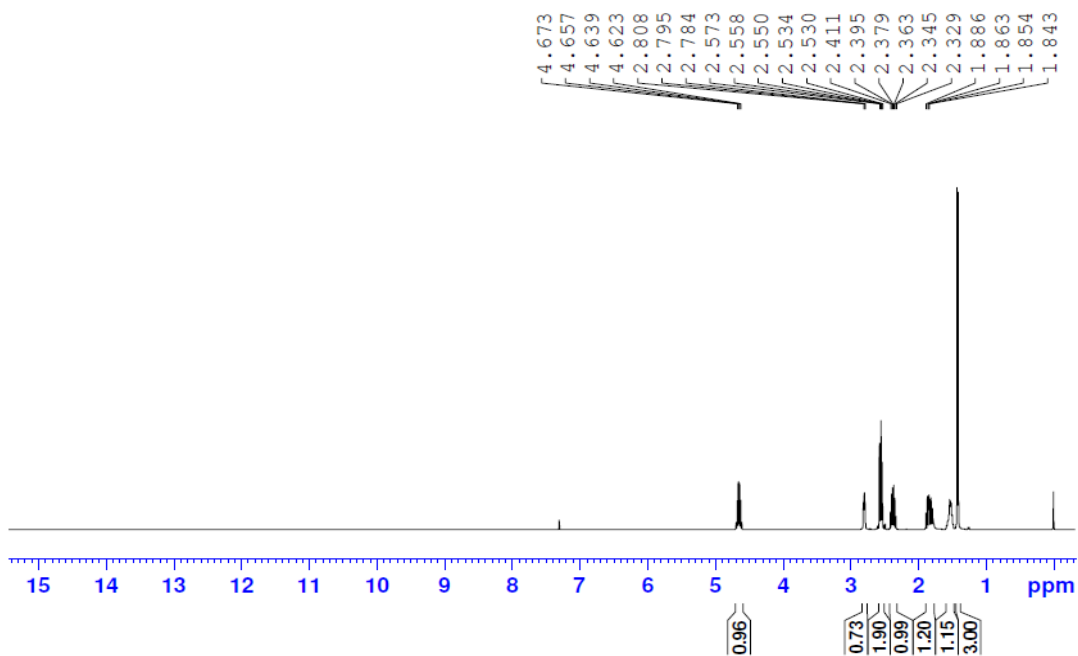

**Figure 7.**  $^1\text{H}$  NMR of 20% PIP in GVL at 0 min

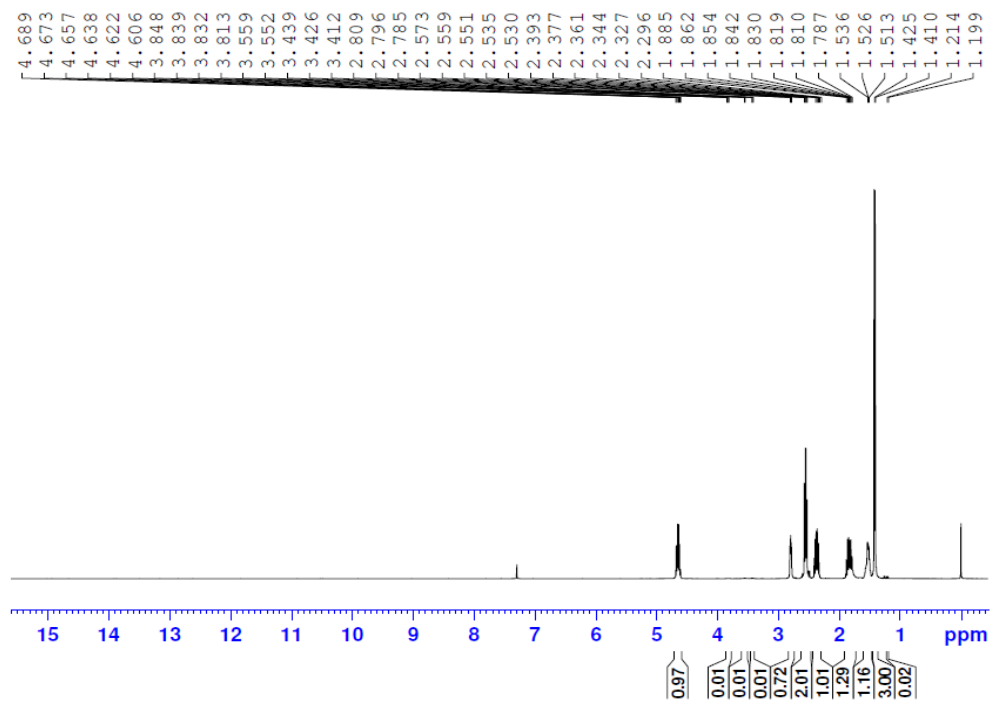

**Figure 8.**  $^1\text{H}$  NMR of 20% PIP in GVL after 2 h

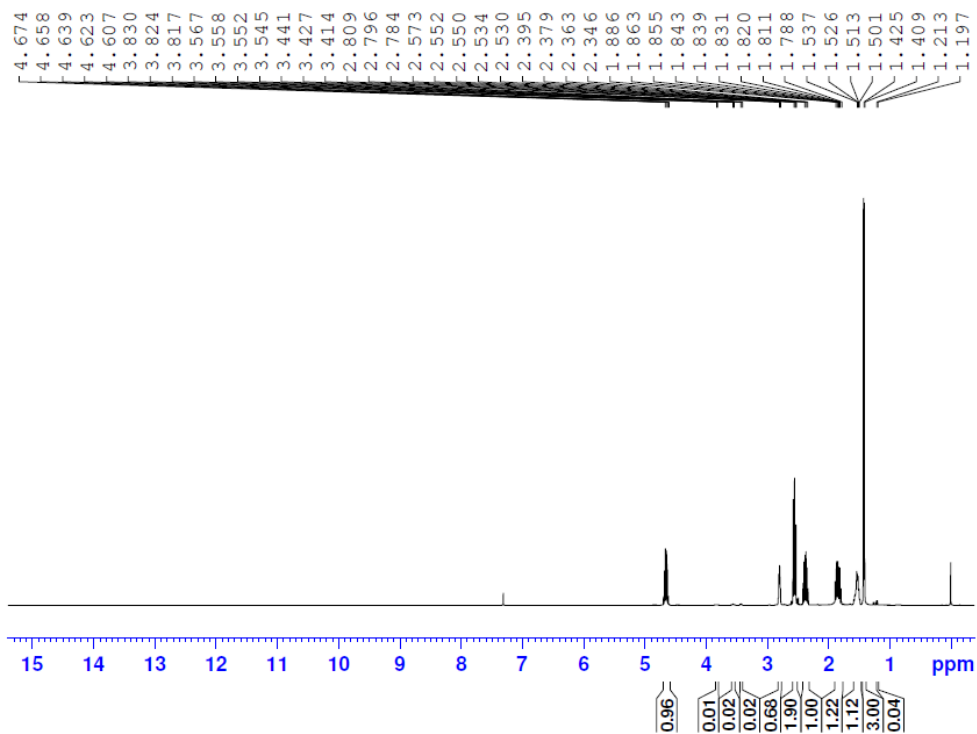

**Figure 9.**  $^1\text{H}$  NMR of 20% PIP in GVL after 4 h

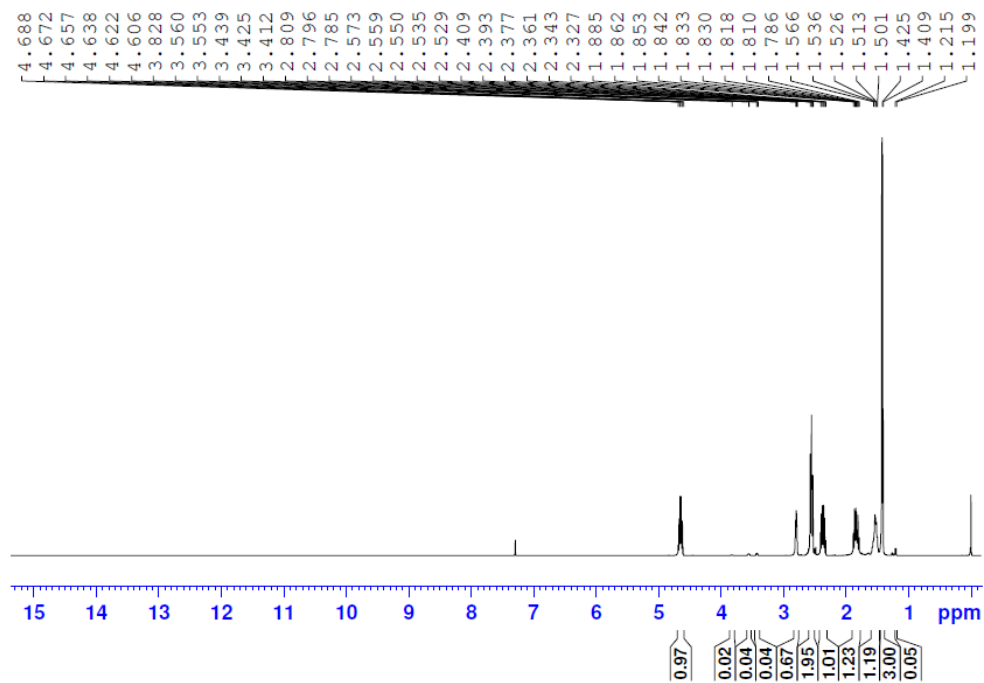

Figure 10.  $^1\text{H}$  NMR of 20% PIP in GVL after 6 h

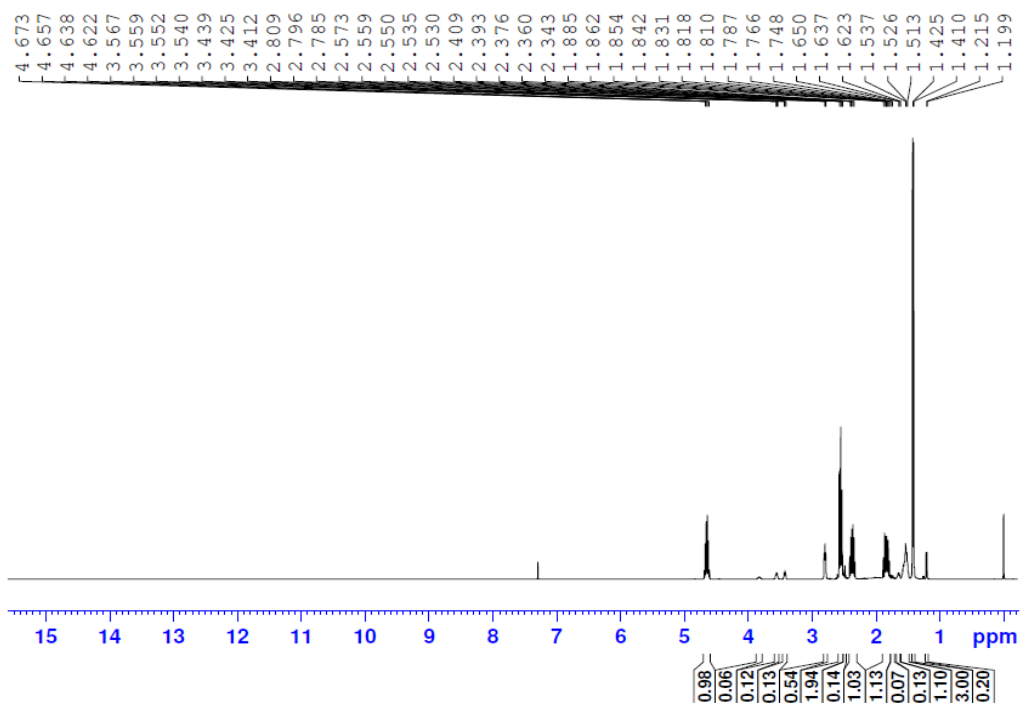

Figure 11.  $^1\text{H}$  NMR of 20% PIP in GVL after 24 h

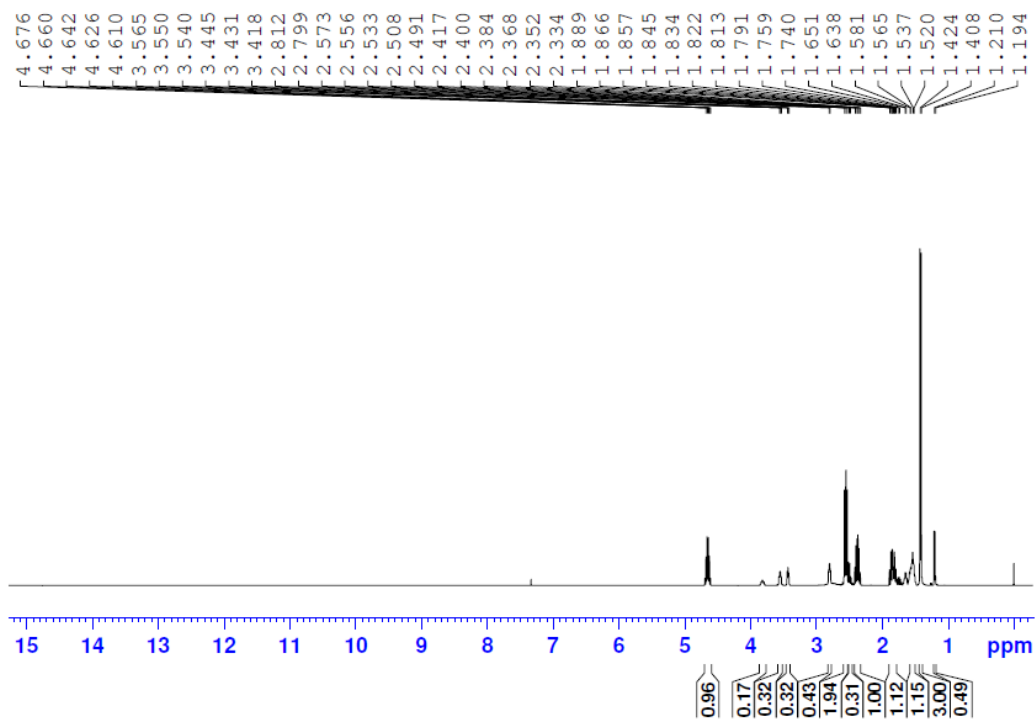

**Figure 12.**  $^1\text{H}$  NMR of 20% PIP in GVL after 48 h

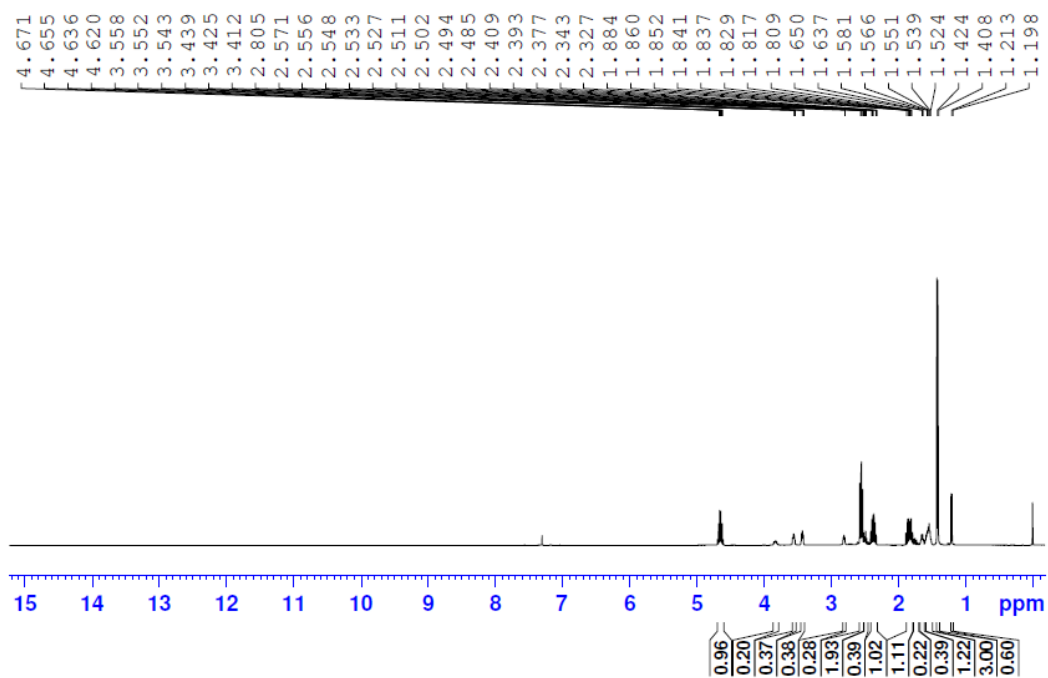

**Figure 13.**  $^1\text{H}$  NMR of 20% PIP in GVL after 72 h



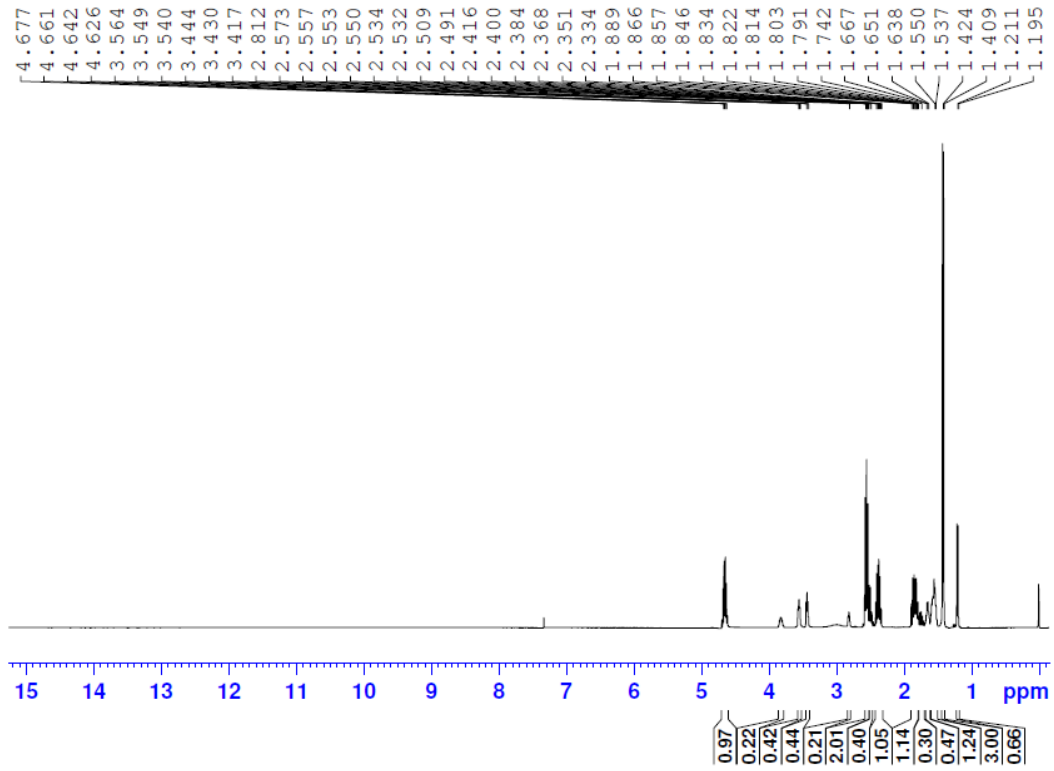

**Figure 14.**  $^1\text{H}$  NMR of 20% PIP in GVL after 96 h

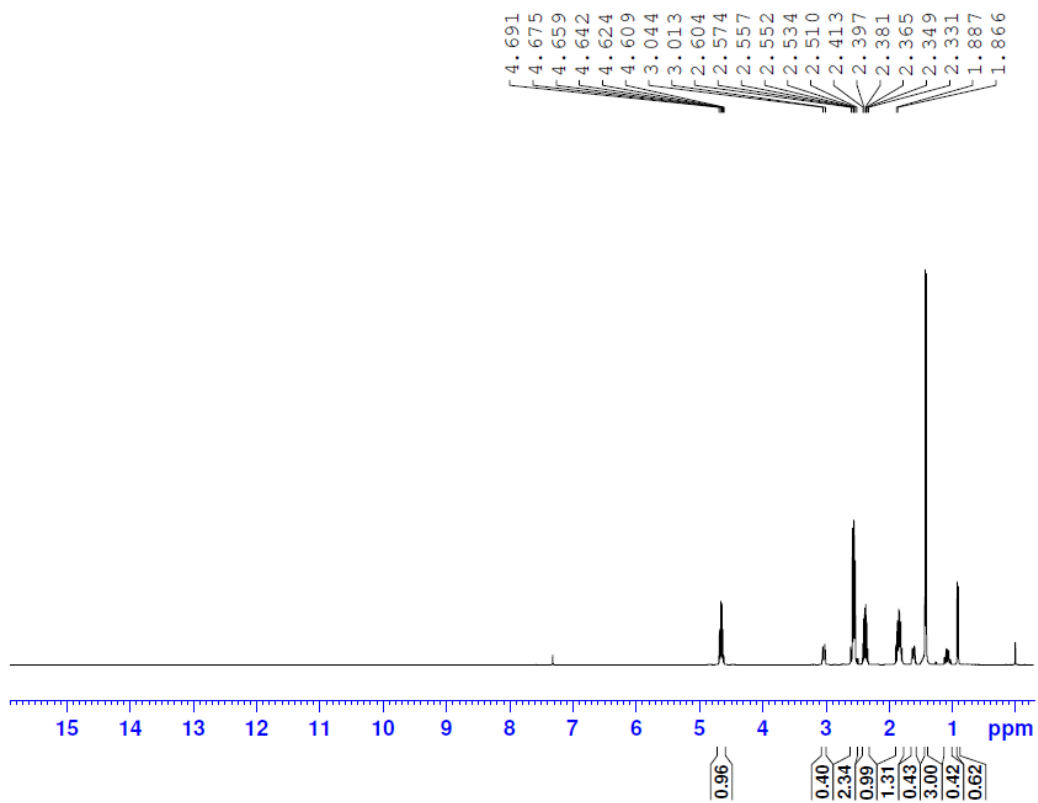

**Figure 15.**  $^1\text{H}$  NMR of 20% 4-MP in GVL at 0 min

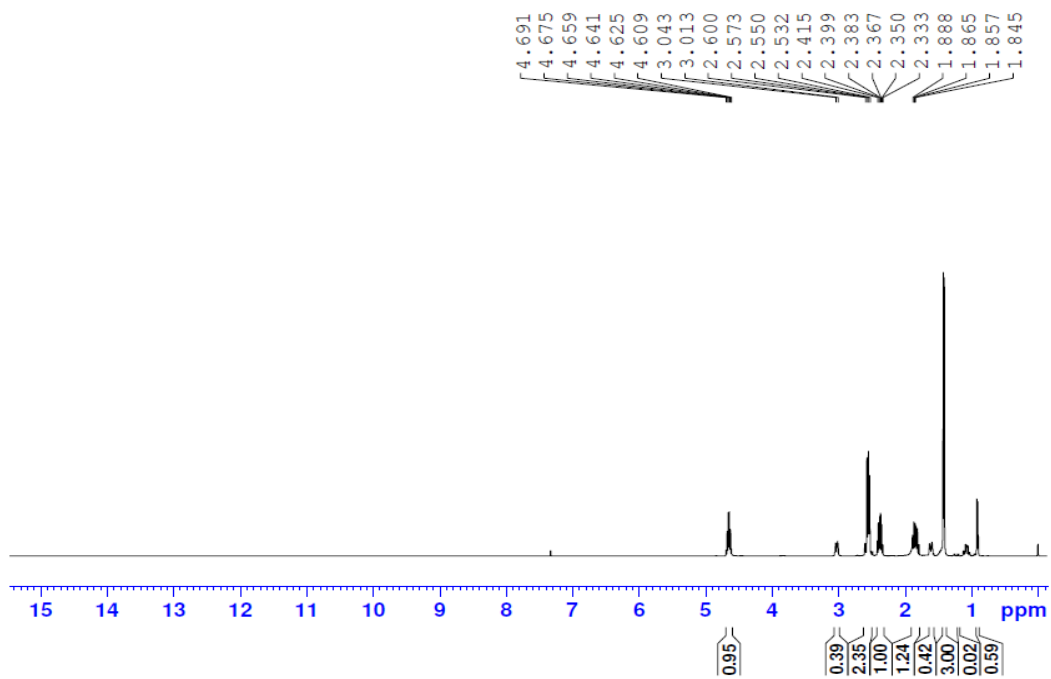

**Figure 16.**  $^1\text{H}$  NMR of 20% 4-MP in GVL after 2 h

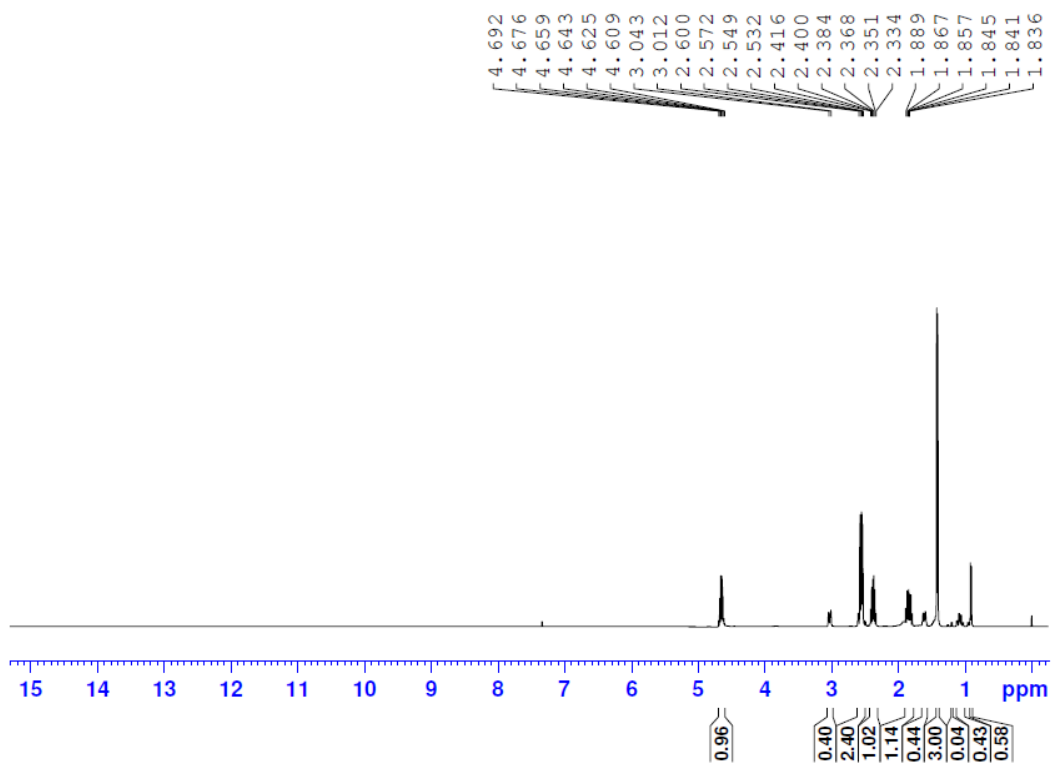

**Figure 17.**  $^1\text{H}$  NMR of 20% 4-MP in GVL after 4 h

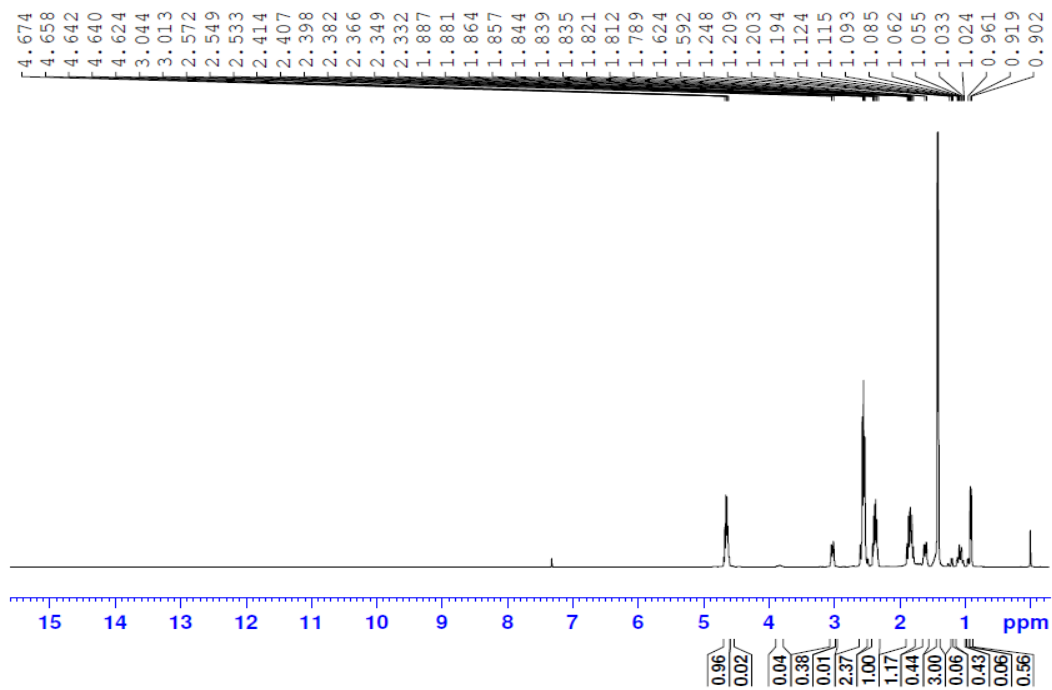

**Figure 18.**  $^1\text{H}$  NMR of 20% 4-MP in GVL after 6 h

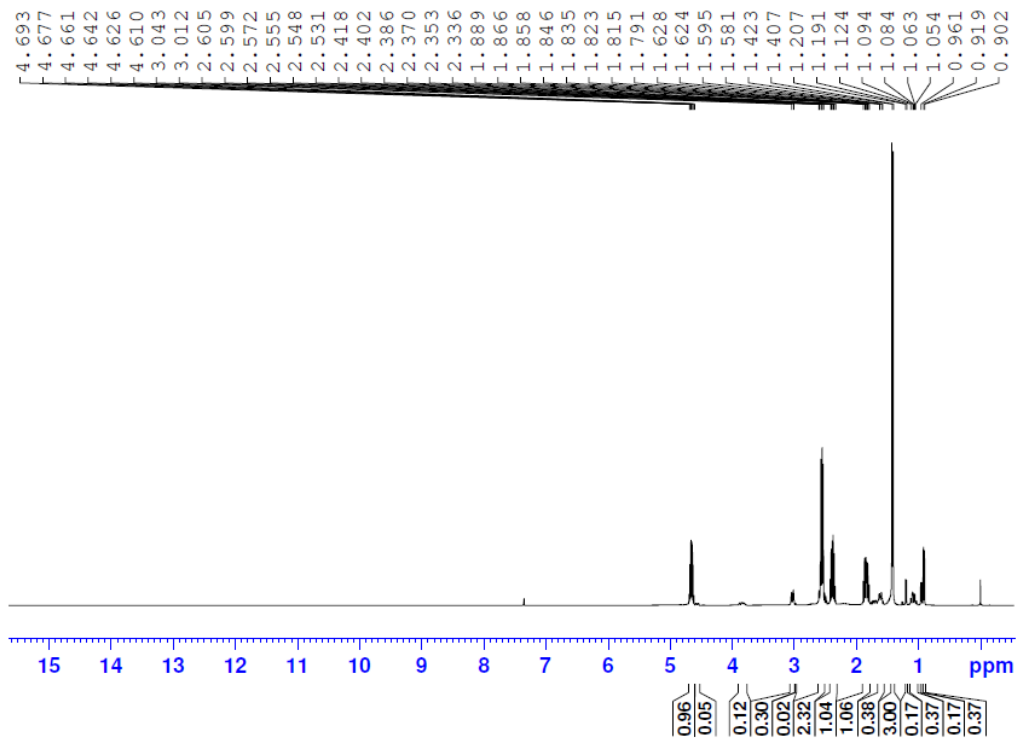

**Figure 19.**  $^1\text{H}$  NMR of 20% 4-MP in GVL after 24 h

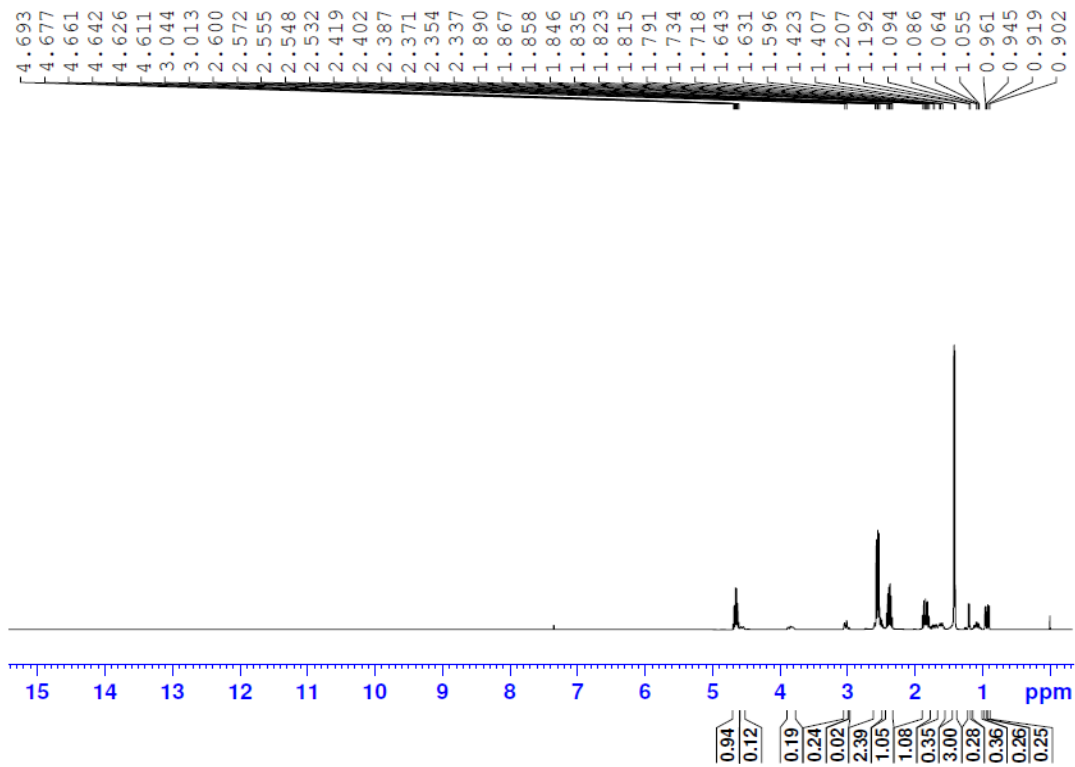

**Figure 20.**  $^1\text{H}$  NMR of 20% 4-MP in GVL after 48 h

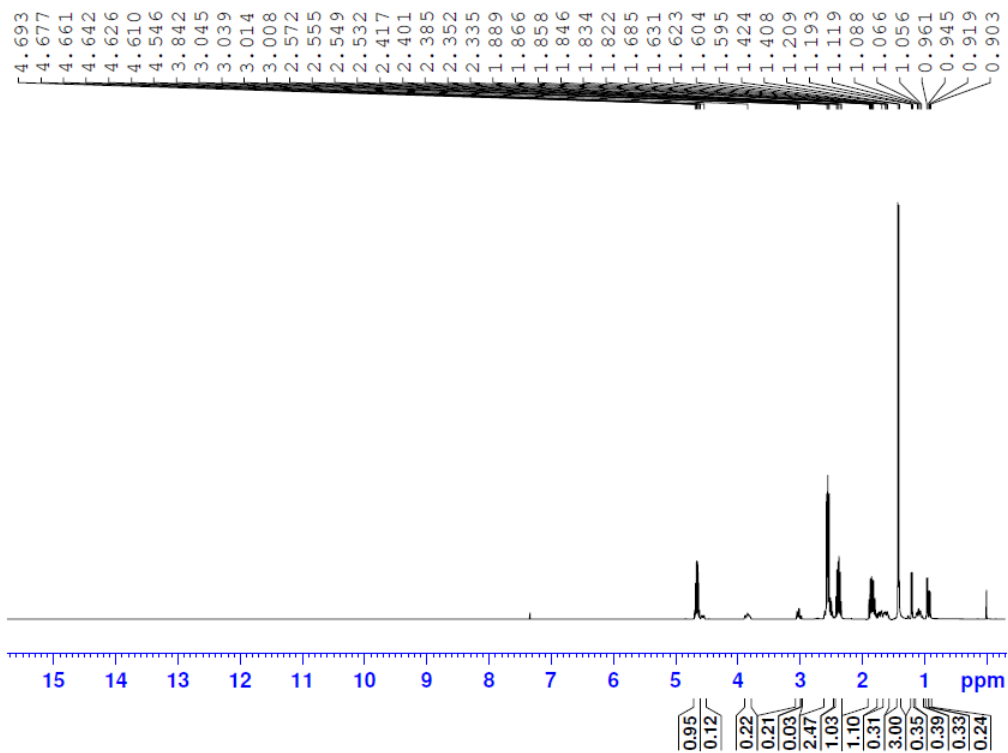

**Figure 21.**  $^1\text{H}$  NMR of 20% 4-MP in GVL after 72 h

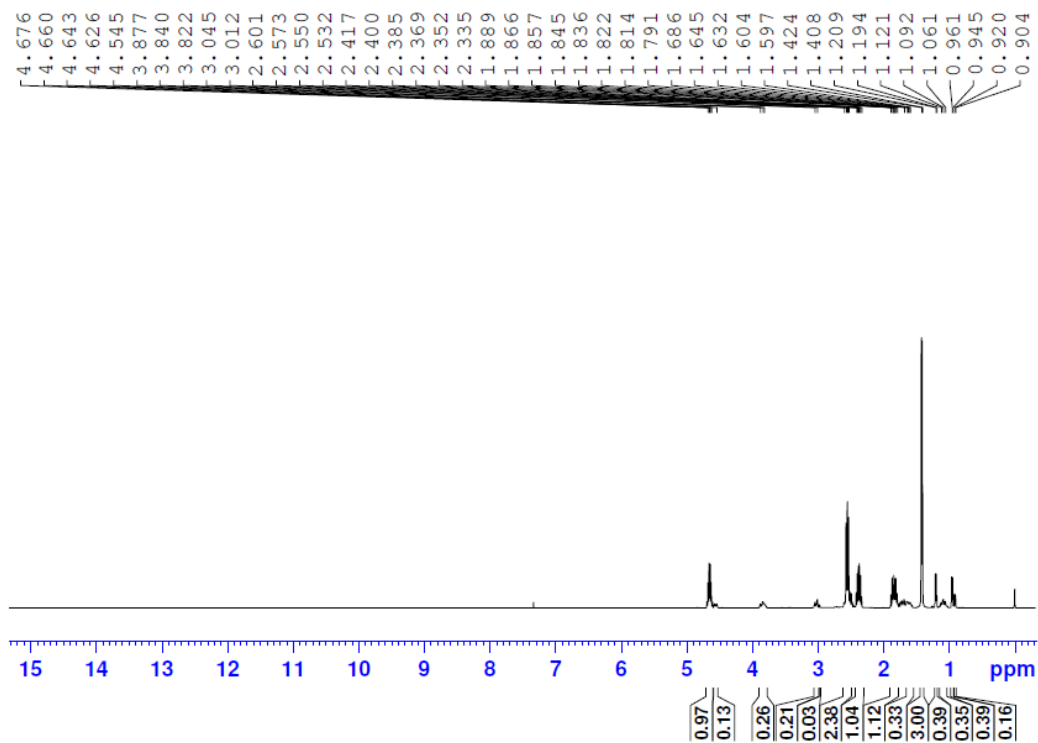

**Figure 22.**  $^1\text{H}$  NMR of 20% 4-MP in GVL after 96h

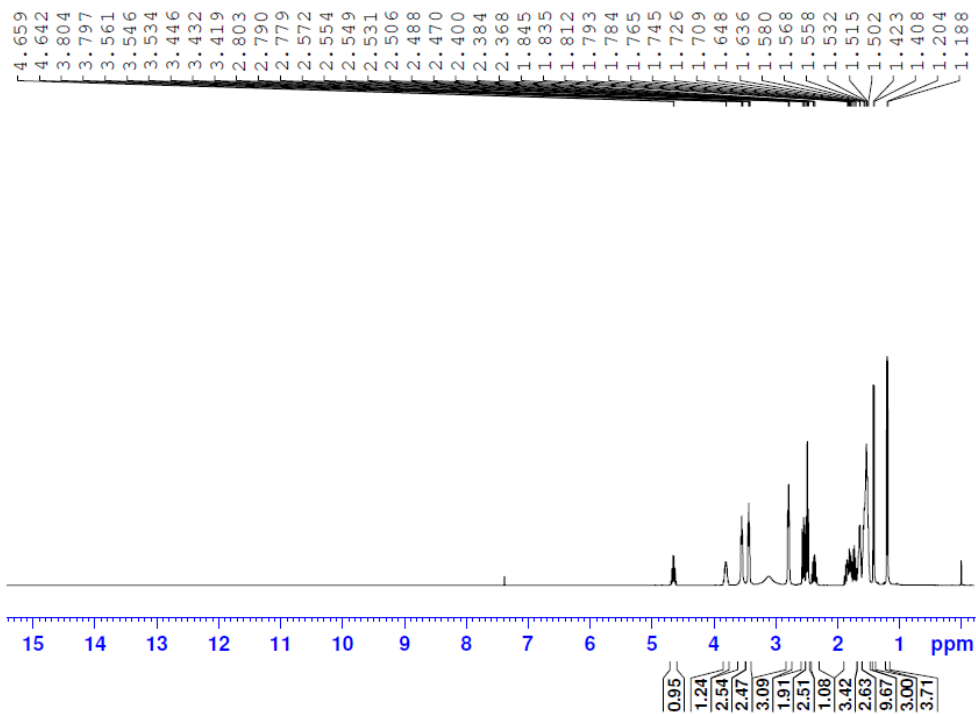

**Figure 23.**  $^1\text{H}$  NMR of equimolar solution of GVL and PIP after 1h MW at 90 °C

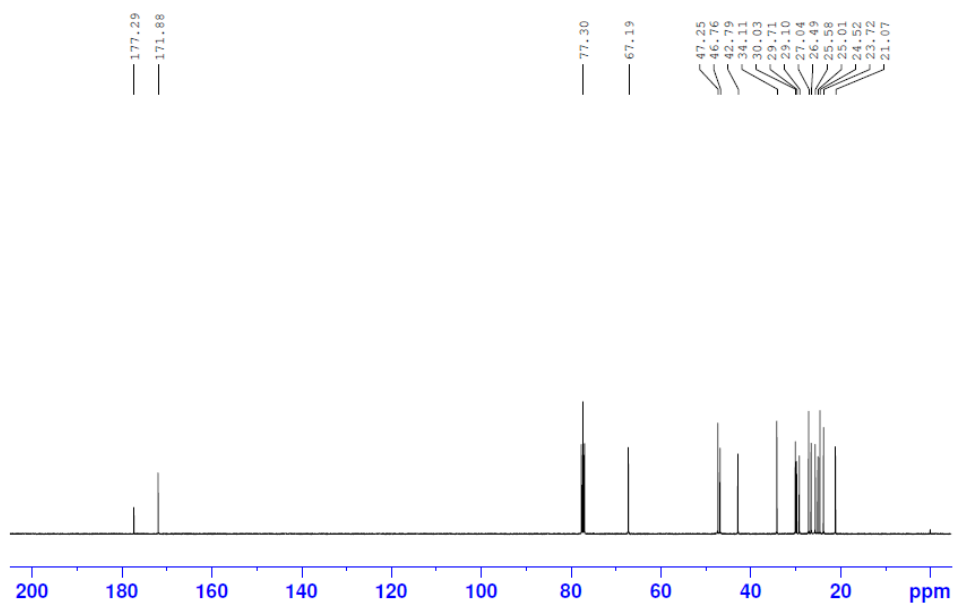

**Figure 24.**  $^{13}\text{C}$  NMR of equimolar solution of GVL and PIP after 1h MW at 90 °C

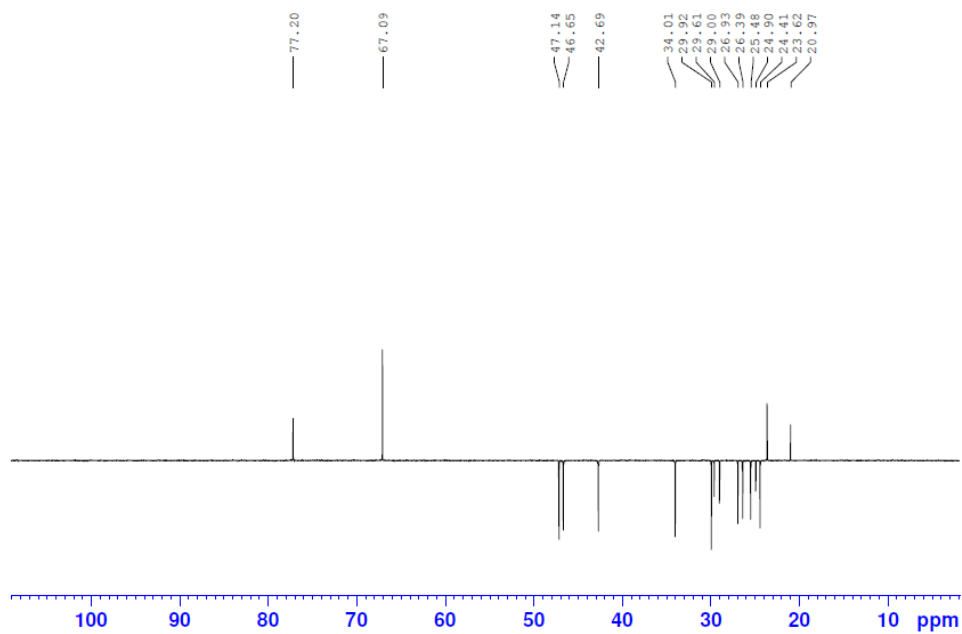

**Figure 25.** DEPT 135 NMR of equimolar solution of GVL and PIP after 1h MW at 90 °C

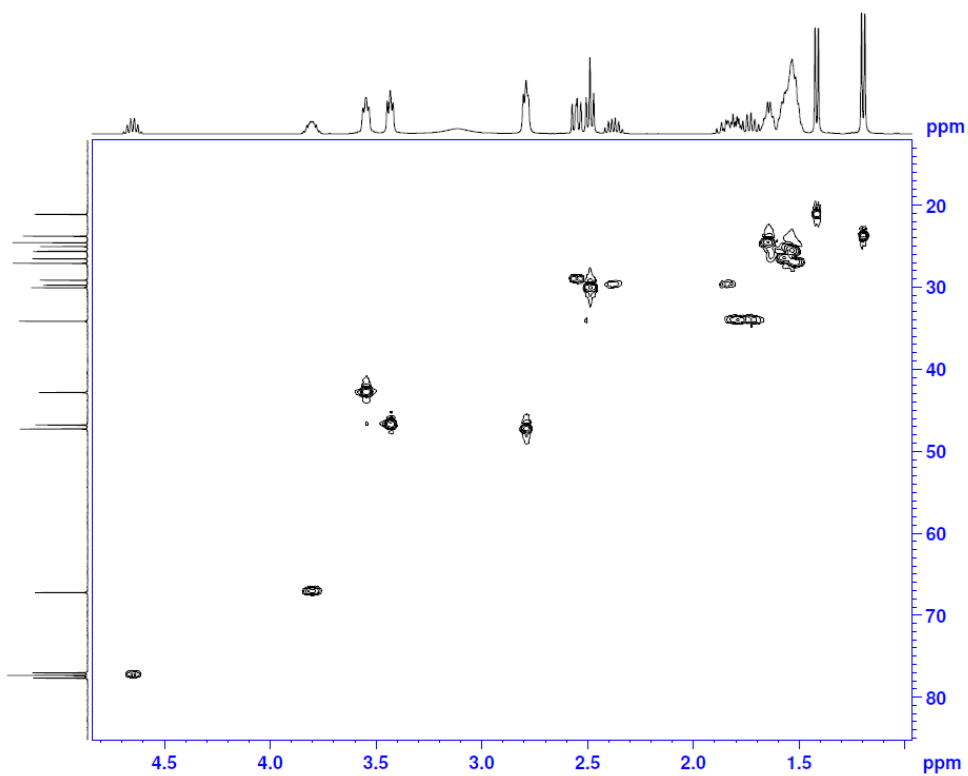

**Figure 26.** HSQC of equimolar solution of GVL and PIP after 1h MW at 90 °C

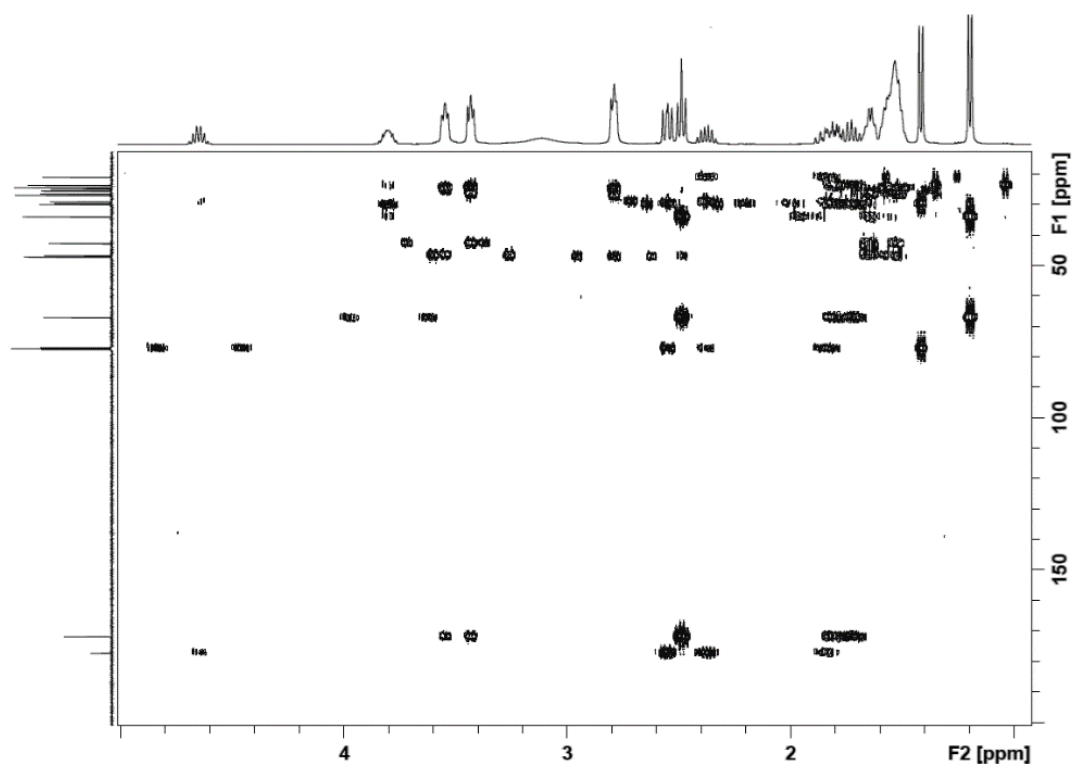

**Figure 27.** HMBC of equimolar solution of GVL and PIP after 1h MW at 90 °C

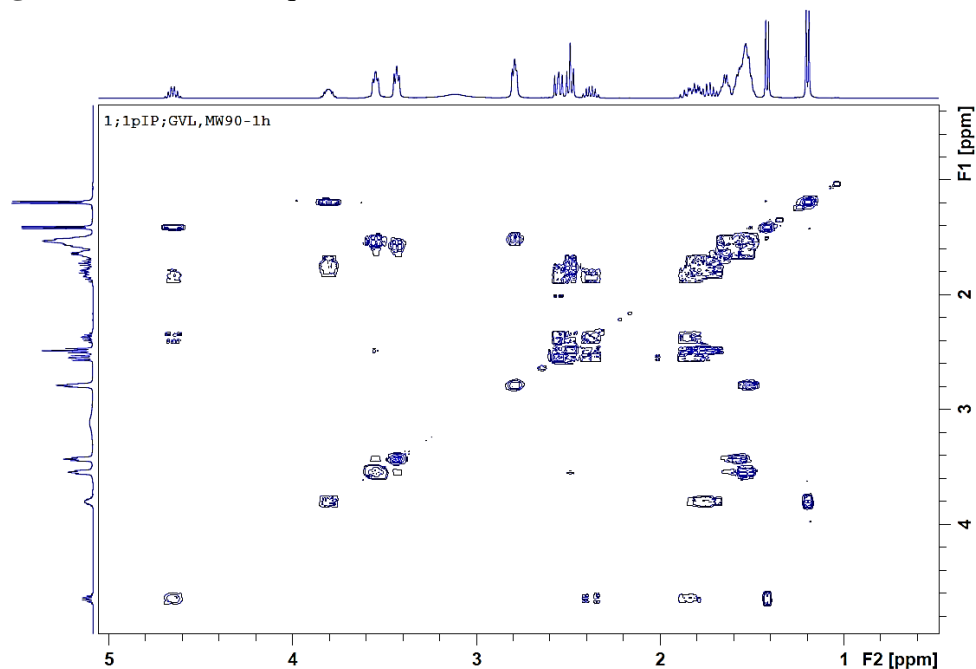

**Figure 28.** COSY of equimolar solution of GVL and PIP after 1h MW at 90 °C

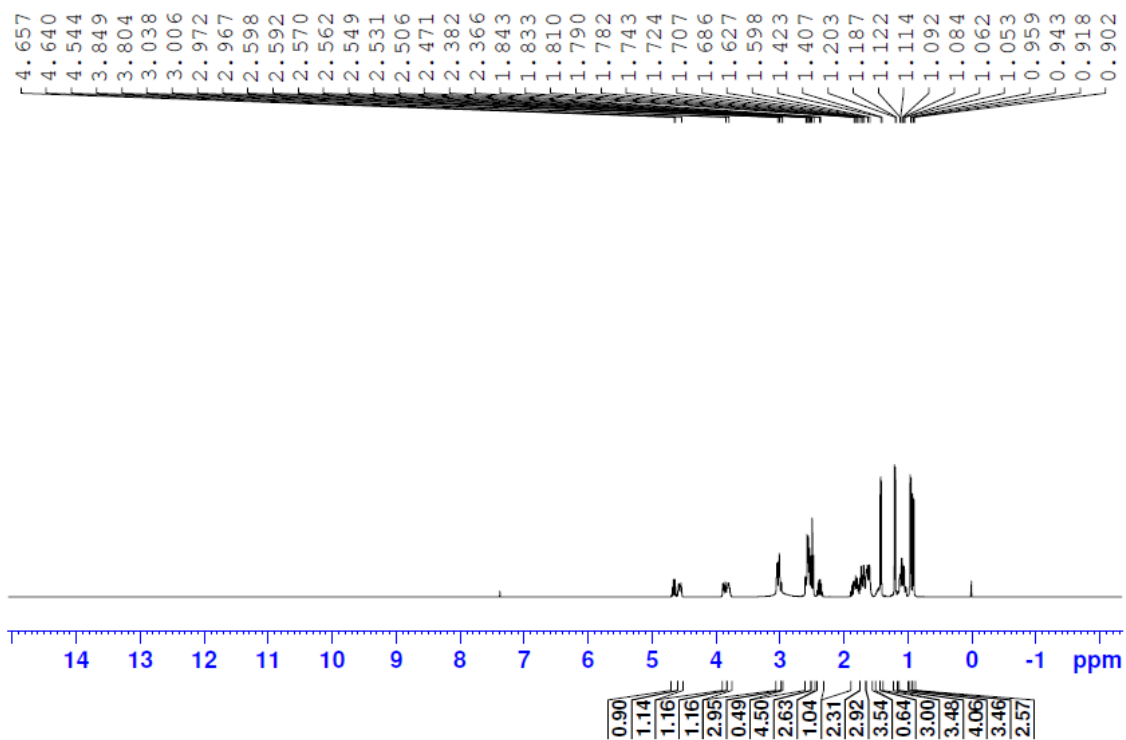



**Figure 29.**  $^1\text{H}$  NMR of equimolar solution of GVL and 4-MP after 1h MW at 90  $^\circ\text{C}$

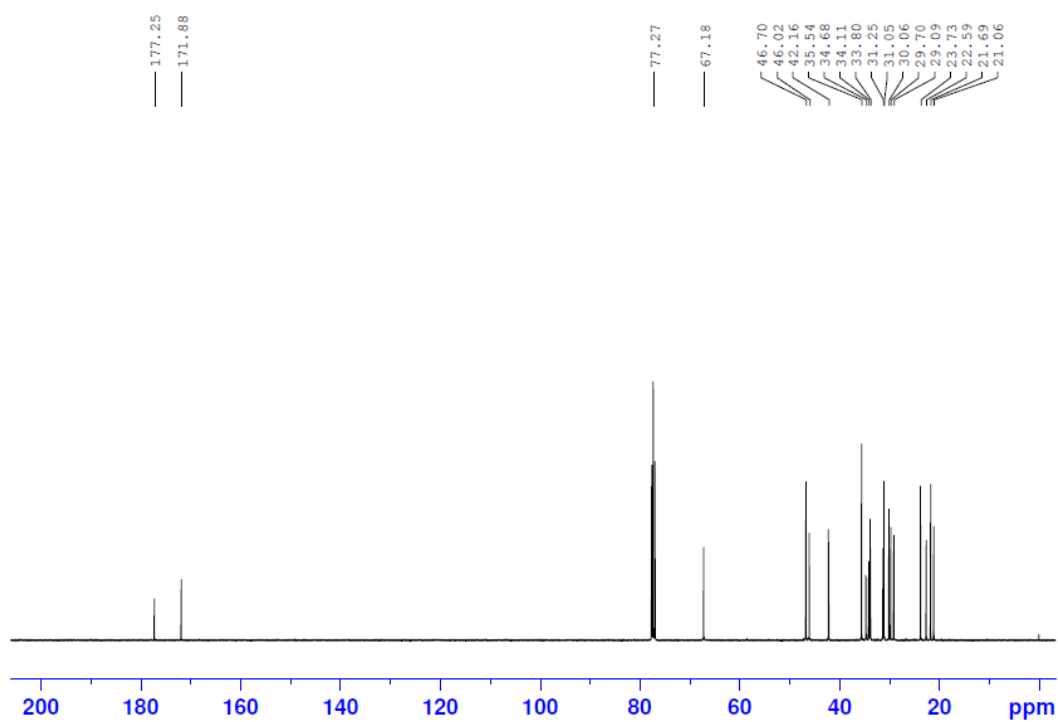

**Figure 30.**  $^{13}\text{C}$  NMR of equimolar solution of GVL and 4-MP after 1h MW at 90  $^\circ\text{C}$

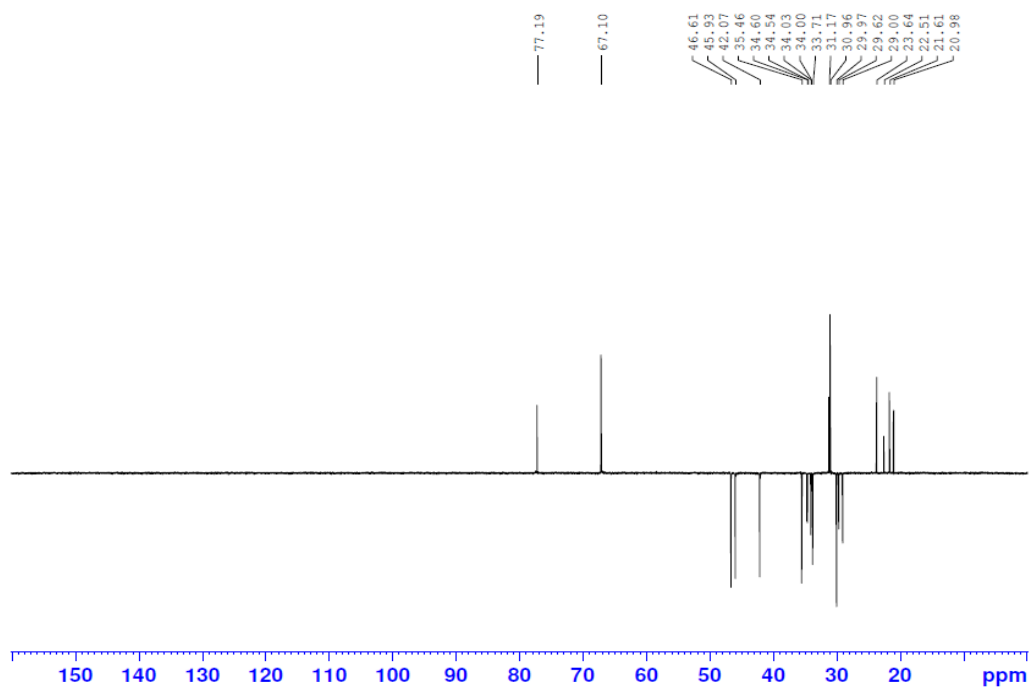

**Figure 31.** DEPT 135 of equimolar solution of GVL and 4-MP after 1h MW at 90  $^\circ\text{C}$

**31. Table 1.**  $^1\text{H}$  (400MHz),  $^{13}\text{C}$  (100MHz) NMR and HMBC correlation of mixture of Product (**3a**) GVL and PIP

| S.N. | $^{13}\text{C}$       | HSQC       | HMBC                    |
|------|-----------------------|------------|-------------------------|
| 1    | 177.2, C              |            |                         |
| 2    | 171.8, C              |            |                         |
| 3    | 77.2, CH <sub>2</sub> | 4.64       | 177.2, 29.0             |
| 4    | 67.3, CH <sub>2</sub> | 3.80       | 30.0                    |
| 5    | 47.3, CH <sub>2</sub> | 2.78       | 47.3, 25.1              |
| 6    | 46.7, CH <sub>2</sub> | 3.42       | 171.8, 42.8, 26.4, 24.5 |
| 7    | 42.8, CH <sub>2</sub> | 3.54       | 171.8, 46.7, 24.5       |
| 8    | 34.0, CH <sub>2</sub> | 1.80, 1.73 | 171.8, 67.3, 23.7       |
| 9    | 30.0, CH <sub>2</sub> | 2.48       | 171.8, 67.3, 34.0       |
| 10   | 29.7, CH <sub>2</sub> | 2.37, 1.83 | 177.2, 29.1, 21.0       |
| 11   | 29.0, CH <sub>2</sub> | 2.54       | 177.2, 77.3, 29.7       |
| 12   | 27.1, CH <sub>2</sub> | 1.51       | 47.3, 27.2              |
| 13   | 26.4, CH <sub>2</sub> | 1.56       | 46.7, 25.5              |
| 14   | 25.5, CH <sub>2</sub> | 1.53       | 42.8, 26.4              |
| 15   | 25.0, CH <sub>2</sub> | 1.54       | 47.3                    |
| 16   | 24.5, CH <sub>2</sub> | 1.64       | 46.7, 42.8, 26.4, 25.5  |
| 17   | 23.7, CH <sub>3</sub> | 1.20       | 67.3, 34.0              |
| 18   | 21.0, CH <sub>3</sub> | 1.42       | 77.2, 29.7              |

### 32. Cartesian Coordinates for GVL

# opt freq b3lyp/6-311++g(d,p) geom=connectivity

Title Card Required

```
0 1
C      -0.46421691   -2.02938416    0.16968728
C      1.03212722   -1.77689887    0.32857778
C     -0.03308555    0.20830045    0.55725610
C     -0.86904336   -0.68113472   -0.36423812
H     -0.72143220   -2.84260435   -0.47638795
H     -0.90564501   -2.21791732    1.12598038
H      1.47580639   -1.60517197   -0.62983689
H     -1.92352816   -0.50271869   -0.33062974
H     -0.54567284   -0.55801271   -1.37674613
O     -0.26438007    1.42309043    0.79040567
O      1.07112529   -0.55847077    1.13135974
C      1.76866489   -2.94920086    1.00298145
H      1.67844658   -3.82457648    0.39431227
H      2.80290308   -2.70088169    1.11955309
H      1.33639520   -3.13666592    1.96365818
```

1 2 1.0 4 1.0 5 1.0 6 1.0

2 7 1.0 11 1.0 12 1.0

3 4 1.0 10 2.0 11 1.0

4 8 1.0 9 1.0

5

6

7

8

9

10

11

12 13 1.0 14 1.0 15 1.0

13

14

15

### 33. Coordinates for PIP

# opt freq b3lyp/6-311++g(d,p) geom=connectivity

Title Card Required

```
0 1
C     -2.67620952   -2.84380601    0.04207373
C     -1.12628081   -2.88283691   -0.03726108
C     -0.56947933   -1.43538667   -0.10783526
C     -1.46586451   -0.58547088    0.73225457
C     -3.12274320   -1.68343399   -0.78602352
H      0.44888390   -1.44294393    0.22046219
H     -0.79496123   -3.40780391    0.83425311
H     -0.77289576   -3.38270760   -0.91484201
H     -2.61672628   -1.73768905   -1.72724786
H     -3.01700505   -2.65852499    1.03928451
H     -1.60411163   -1.08132762    1.67029179
```

|   |             |             |             |
|---|-------------|-------------|-------------|
| H | -1.06280140 | 0.39016604  | 0.90710517  |
| H | -4.17927336 | -1.68092073 | -0.95525029 |
| H | -3.06083158 | -3.78476272 | -0.29194174 |
| H | -0.61575042 | -1.04149819 | -1.10162139 |
| N | -2.75750696 | -0.44130670 | -0.02264446 |
| H | -2.70323162 | 0.28353416  | -0.70941947 |

```

1 2 1.0 5 1.0 10 1.0 14 1.0
2 3 1.0 7 1.0 8 1.0
3 4 1.0 6 1.0 15 1.0
4 11 1.0 12 1.0 16 1.0
5 9 1.0 13 1.0 16 1.0
6
7
8
9
10
11
12
13
14
15
16 17 1.0
17

```

### 34. Coordinates of 4-MP

```
# opt freq b3lyp/6-311++g(d,p) geom=connectivity
```

```
Title Card Required
```

```

0 1
C      -2.67620952   -2.84380601    0.04207373
C      -1.12628081   -2.88283691   -0.03726108
C      -0.56947933   -1.43538667   -0.10783526
C      -1.46586451   -0.58547088    0.73225457
C      -3.12274320   -1.68343399   -0.78602352
H       0.44888390   -1.44294393    0.22046219
H      -0.79496123   -3.40780391    0.83425311
H      -2.61672628   -1.73768905   -1.72724786
H      -3.01700505   -2.65852499    1.03928451
H      -1.60411163   -1.08132762    1.67029179
H      -1.06280140    0.39016604    0.90710517
H      -4.17927336   -1.68092073   -0.95525029
H      -3.06083158   -3.78476272   -0.29194174
H      -0.61575042   -1.04149819   -1.10162139
N      -2.75750696   -0.44130670   -0.02264446
H      -2.70323162    0.28353416   -0.70941947
C      -0.61767055   -3.60227697   -1.30032149
H       0.43902485   -3.75229351   -1.22423023
H      -1.10666592   -4.54952456   -1.39254699
H      -0.83198569   -3.00488329   -2.16176784

```

```

1 2 1.0 5 1.0 9 1.0 13 1.0
2 3 1.0 7 1.0 17 1.0
3 4 1.0 6 1.0 14 1.0
4 10 1.0 11 1.0 15 1.0

```

5 8 1.0 12 1.0 15 1.0  
 6  
 7  
 8  
 9  
 10  
 11  
 12  
 13  
 14  
 15 16 1.0  
 16  
 17 18 1.0 19 1.0 20 1.0  
 18  
 19  
 20

### 35. Coordinates for TS for GVL+PIP

# opt=(calcfc,ts) freq b3lyp/6-31++g(d,p) geom=connectivity

Title Card Required

|     |             |             |             |
|-----|-------------|-------------|-------------|
| 0 1 |             |             |             |
| C   | 2.79608000  | -0.82937400 | -0.32050900 |
| C   | 1.44727700  | -1.56441900 | -0.33516800 |
| C   | 0.53133000  | -0.89183200 | 0.67448300  |
| C   | 2.48434900  | 0.64629800  | -0.66384300 |
| H   | 3.23037700  | -0.89631700 | 0.68468400  |
| H   | 3.50016100  | -1.28877700 | -1.02539800 |
| H   | 1.54896100  | -2.61330200 | -0.03679900 |
| H   | 1.03362800  | -1.53058200 | -1.34890900 |
| H   | 2.35779300  | 0.70605100  | -1.76738200 |
| C   | -1.49493800 | 0.53204000  | 1.14975700  |
| C   | -2.62791700 | 1.36409100  | 0.54767600  |
| C   | -3.57592700 | 0.50352900  | -0.29943100 |
| C   | -2.78373800 | -0.26835700 | -1.36291700 |
| C   | -1.64245200 | -1.07361700 | -0.73496100 |
| H   | -3.17029500 | 1.85092200  | 1.36590200  |
| H   | -1.86864700 | -0.21329100 | 1.85862200  |
| H   | -0.76080500 | 1.15124100  | 1.66503400  |
| H   | -4.10612600 | -0.20767900 | 0.34933100  |
| H   | -4.33994600 | 1.12811500  | -0.77507300 |
| H   | -3.43263600 | -0.95771400 | -1.91513200 |
| H   | -2.36547900 | 0.43282500  | -2.09737900 |
| H   | -2.03430500 | -1.85136900 | -0.06736400 |
| H   | -1.04082500 | -1.55949400 | -1.50479300 |
| H   | -2.20028700 | 2.16602400  | -0.06850600 |
| O   | 1.29437100  | 0.97910500  | -0.01299900 |
| O   | 0.54479200  | -1.10103100 | 1.86622200  |
| N   | -0.75132600 | -0.19761000 | 0.07707000  |
| H   | -0.12781400 | 0.52763800  | -0.43940200 |
| C   | 3.63020500  | 1.58704000  | -0.27556700 |
| H   | 4.56779600  | 1.30914000  | -0.77518200 |
| H   | 3.38266000  | 2.61647000  | -0.55337100 |
| H   | 3.78616700  | 1.55638500  | 0.80872000  |

```

1 2 1.0 4 1.0 5 1.0 6 1.0
2 3 1.0 7 1.0 8 1.0
3 26 2.0
4 9 1.0 25 1.0 29 1.0
5
6
7
8
9
10 11 1.0 16 1.0 17 1.0 27 1.0
11 12 1.0 15 1.0 24 1.0
12 13 1.0 18 1.0 19 1.0
13 14 1.0 20 1.0 21 1.0
14 22 1.0 23 1.0 27 1.0
15
16
17
18
19
20
21
22
23
24
25
26
27
28
29 30 1.0 31 1.0 32 1.0
30
31
32

```

### 36. Coordinates for TS for GVL+PIP

```
# opt=(calcfc,ts) freq b3lyp/6-31++g(d,p) geom=connectivity
```

Title Card Required

```

0 1
C          3.20123400   -0.55953500   -0.54521600
C          1.92665300   -1.41165300   -0.64044400
C          1.01366600   -1.02797200    0.51301800
C          2.73681400    0.91495800   -0.59630400
H          3.69769900   -0.76299100    0.41175600
H          3.90204400   -0.81117600   -1.35091000
H          2.14156800   -2.48136900   -0.54530700
H          1.45150500   -1.23855800   -1.61237200
H          2.54061800    1.15951900   -1.66352800
C          -1.09904700    0.08299400    1.32379600
C          -2.33252900    0.89417900    0.92976700
C          -3.26888300    0.11956100   -0.01309700
C          -2.46268600   -0.37775200   -1.22486400
C          -1.21920900   -1.16824900   -0.80888000
H          -2.86379100    1.17921100    1.84567800
H          -1.36336000   -0.80806800    1.90137000
H          -0.39430500    0.67061300    1.91194000

```

|   |             |             |             |
|---|-------------|-------------|-------------|
| H | -3.63642700 | -0.76525700 | 0.53005400  |
| H | -3.08212800 | -1.01708200 | -1.86558200 |
| H | -2.15543200 | 0.48155600  | -1.83751400 |
| H | -1.49827800 | -2.08751200 | -0.27889600 |
| H | -0.62752300 | -1.44803900 | -1.68215900 |
| H | -2.01509800 | 1.82918900  | 0.44730300  |
| O | 1.56152900  | 1.00348700  | 0.15275500  |
| O | 1.11532800  | -1.44658200 | 1.64379700  |
| N | -0.35863000 | -0.36930000 | 0.10685800  |
| H | 0.16439800  | 0.49453700  | -0.29426100 |
| C | 3.81232800  | 1.88103100  | -0.08737900 |
| H | 4.74110600  | 1.79383500  | -0.66677200 |
| H | 3.45556700  | 2.91333400  | -0.16001500 |
| H | 4.03279200  | 1.67176800  | 0.96549000  |
| C | -4.47920300 | 0.95749800  | -0.43899100 |
| H | -5.14743600 | 0.38782500  | -1.09436300 |
| H | -5.05996400 | 1.28188200  | 0.43139000  |
| H | -4.16282500 | 1.85628500  | -0.98215200 |

```

1 2 1.0 4 1.0 5 1.0 6 1.0
2 3 1.0 7 1.0 8 1.0
3 25 2.0
4 9 1.0 24 1.0 28 1.0
5
6
7
8
9
10 11 1.0 16 1.0 17 1.0 26 1.0
11 12 1.0 15 1.0 23 1.0
12 13 1.0 18 1.0 32 1.0
13 14 1.0 19 1.0 20 1.0
14 21 1.0 22 1.0 26 1.0
15
16
17
18
19
20
21
22
23
24
25
26
27
28 29 1.0 30 1.0 31 1.0
29
30
31
32 33 1.0 34 1.0 35 1.0
33
34
35

```

**Figure 31:** Optimized geometry of GVL, PIP and 4-MP with bond lengths

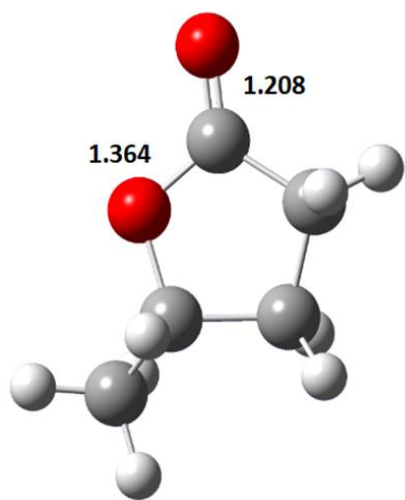

**GVL**

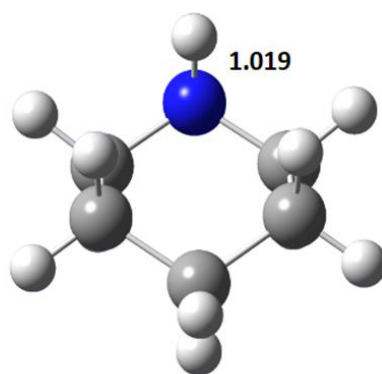

**PIP**

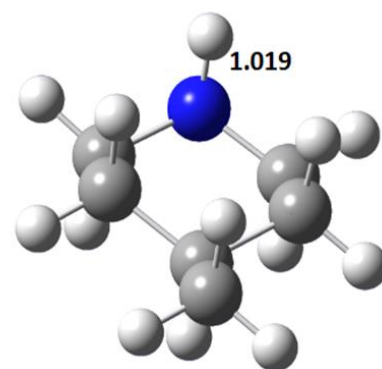

**4-MP**
